# Supplementary material
Source: Springer Nature journal article supplement (https://www.springermedizin.de/resource/supplementary/13075_2011_3523_MOESM6_ESM.pdf/9694702)

## MMP-3 / TIMP-1 & -2

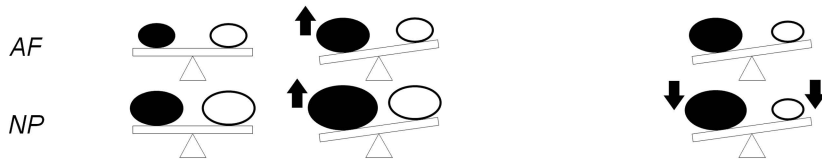

Aggrecan Neopeptide  
by MMPs in the NP & AF

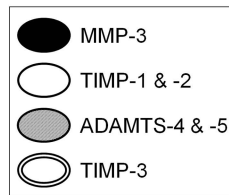

## ADAMTS-4 & -5 / TIMP-3

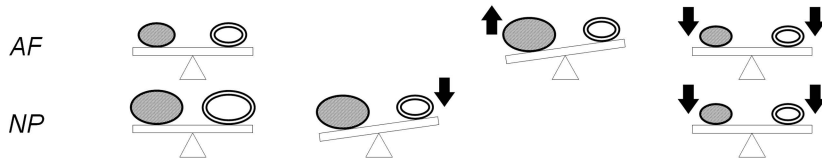

Aggrecan Neopeptide  
by Aggrecanases in the NP & AF

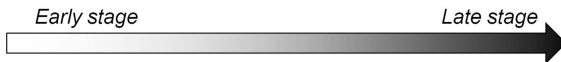

Supplement: MOESM6 [file 9694702]
